# Supplementary material for: A combined experimental and density functional theory study of metformin oxy-cracking for pharmaceutical wastewater treatment
Source: Royal Society of Chemistry journal article supplement (doi:10.1039/c9ra01641d), 2019-01-01
Supplement: c9ra01641d1.pdf [file c9ra01641d1.pdf]

# A Combined Experimental and Density Functional Theory Study of Metformin Oxy-Cracking for Pharmaceutical Wastewater Treatment

*Ismail Badran<sup>1,2</sup>, Abdallah D. Manasrah<sup>1</sup>, Nashaat N. Nassar<sup>1,\*</sup>*

<sup>1</sup>Department of Chemical and Petroleum Engineering, University of Calgary, 2500 University  
Drive NW, Calgary, Alberta, Canada T2N 1N4

<sup>2</sup>Department of Chemistry, An-Najah National University, Nablus, Palestine

\* Corresponding Author: Nashaat N. Nassar, Tel.: +1 403 210 9772; Fax: +1 403 210 3973,

E-mail: [nassar@ucalgary.ca](mailto:nassar@ucalgary.ca)

## Supplementary Information

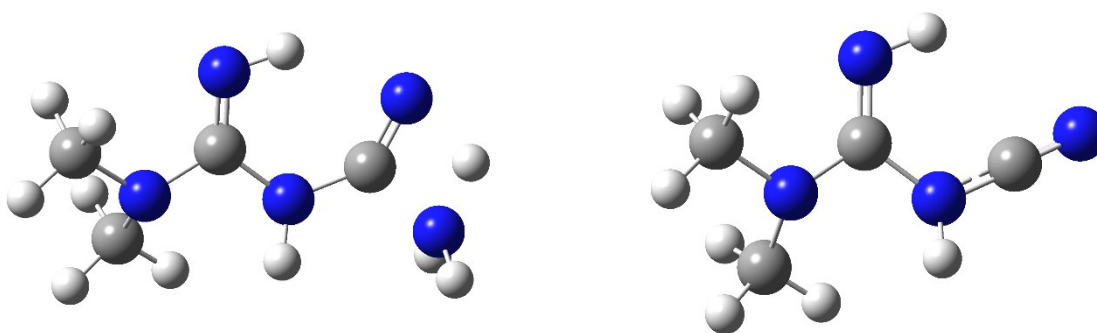

Figure S1: Optimized structures for a) the transition state for the 1,3-H shift in metformin leading to the formation of ammonia, and b) the product of this shift. Both obtained at B3LYP/6-31+G(d,p) level of theory. C atom, grey; N atom, blue.

TS1

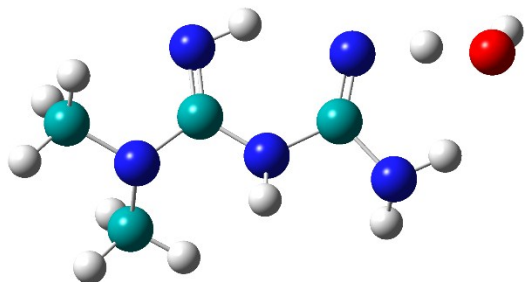

TS2

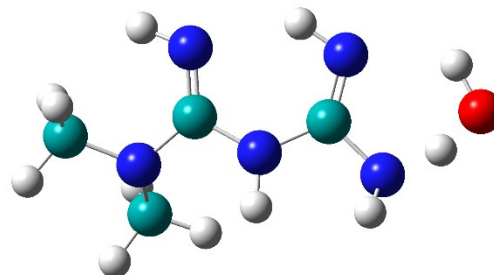

TS3

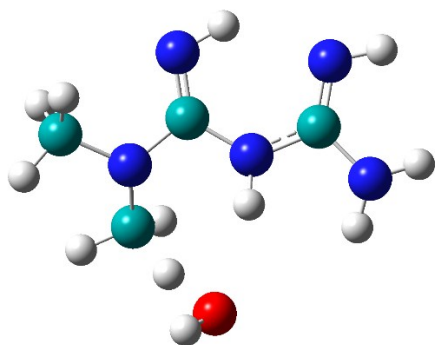

Radical 1

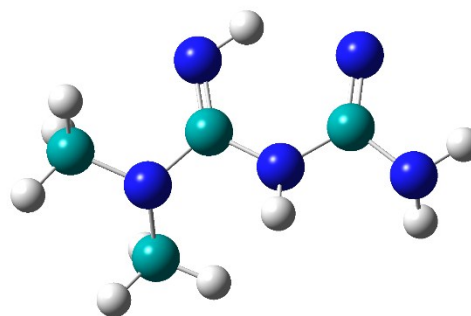

Radical 2

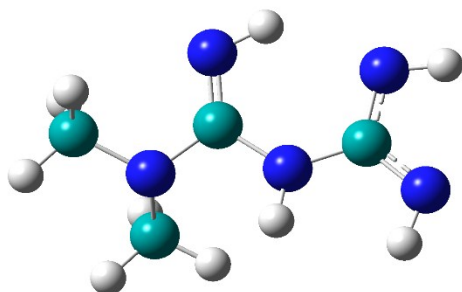

Radical 3

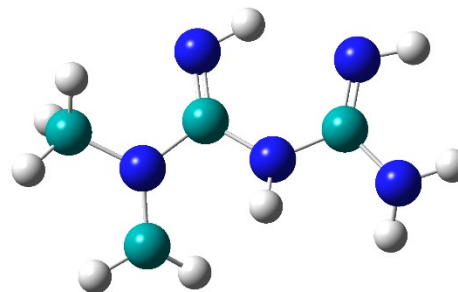

Figure S2: Optimized structures for the transition states and free radicals involved in reaction mechanism A, hydrogen abstraction by OH radical in metformin, obtained at B3LYP/6-31+G(d,p) level of theory. C atom, grey; N atom, blue; O atom, red.

TS4

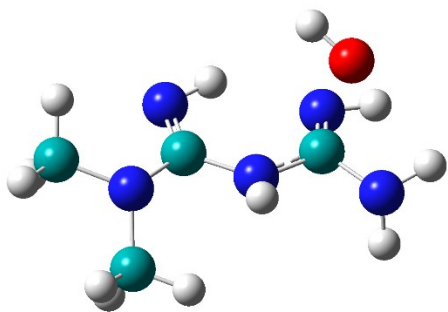

TS5

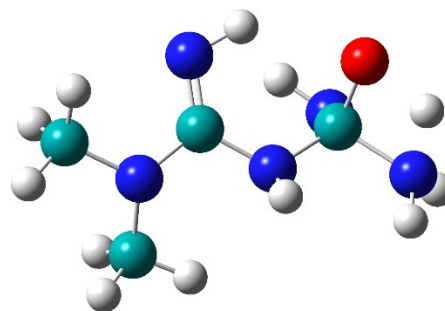

TS6

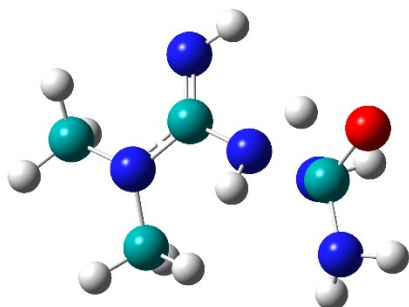

Radical 4

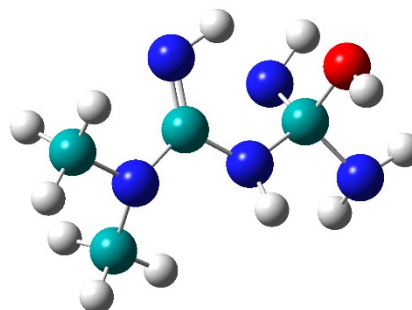

Radical 5

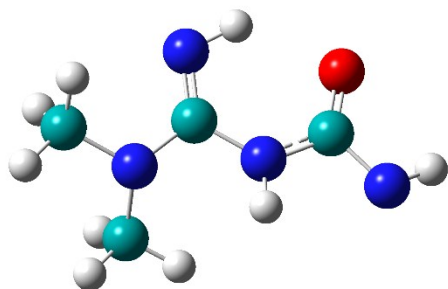

Radical 6

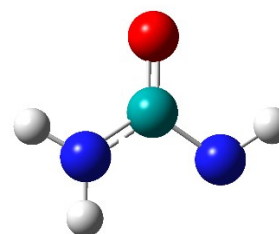

Dimethylguanidin

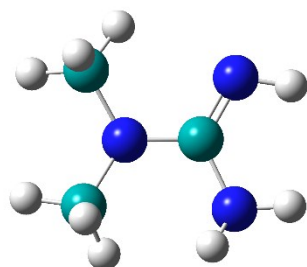

Figure S3: Optimized structures for the transition states and free radicals involved in reaction mechanism B initiated by OH radical attack on C1 in metformin, obtained at B3LYP/6-31+G(d,p) level of theory. C atom, grey; N atom, blue; O atom, red.

TS7

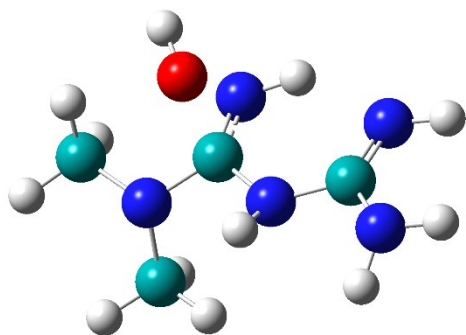

TS8

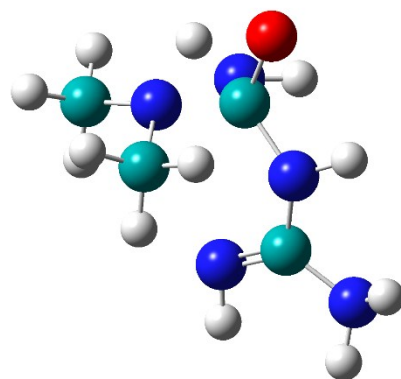

TS9

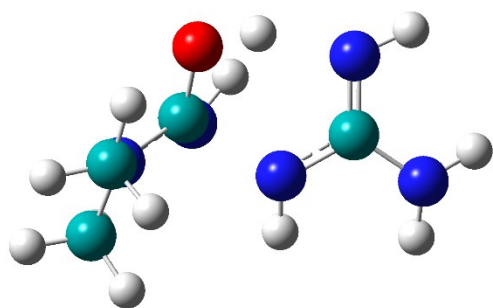

TS10

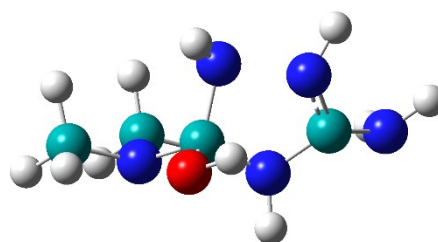

TS11

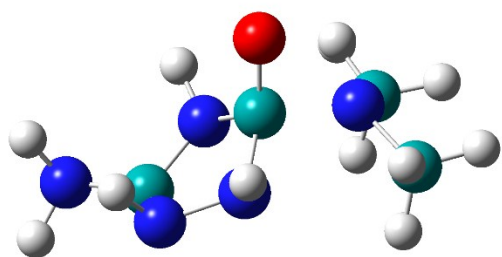

Radical 7

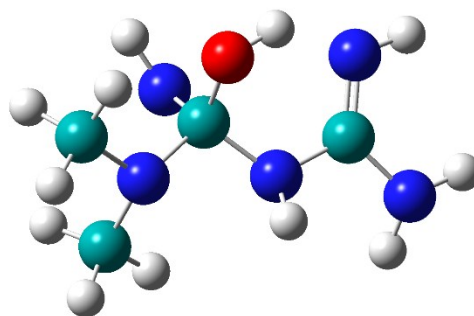

Radical 8

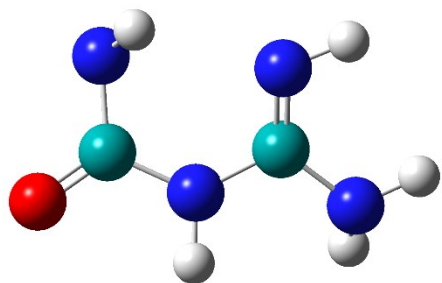

Radical 9

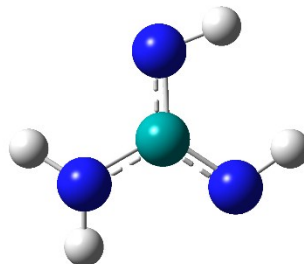

Radical 10

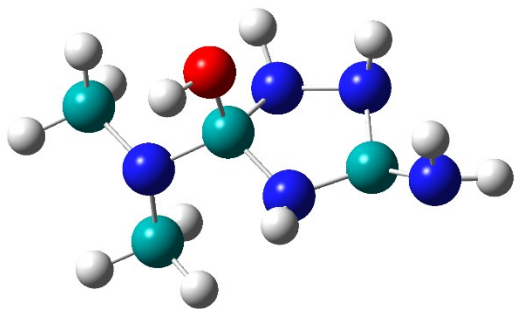

Radical 11

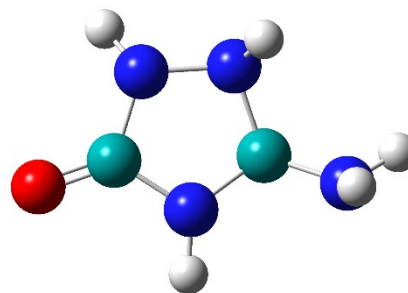

Dimethylamine

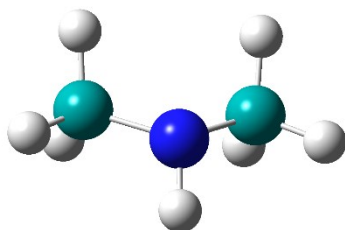

N,N-Dimethylurea

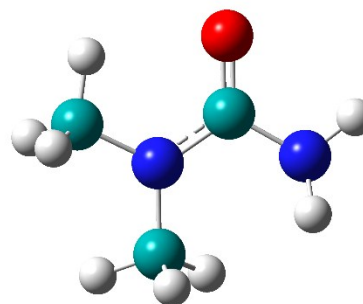

Figure S4: Optimized structures for the transition states and free radicals involved in reaction mechanism C initiated by OH radical attack on C3 in metformin, obtained at B3LYP/6-31+G(d,p) level of theory. C atom, grey; N atom, blue; O atom, red.

TS12

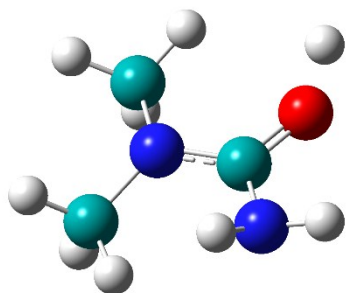

TS13

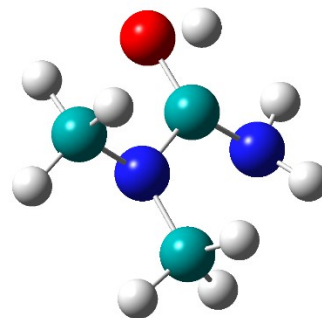

TS14

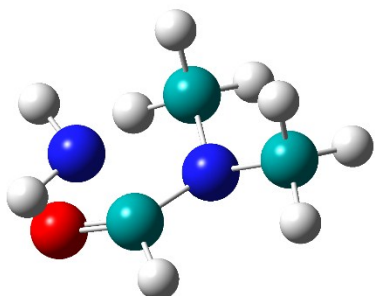

Radical 12

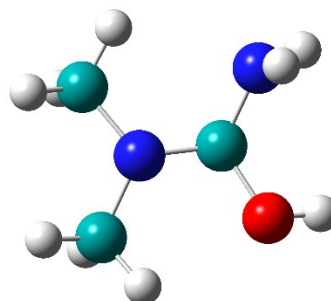

Dimethylformamide

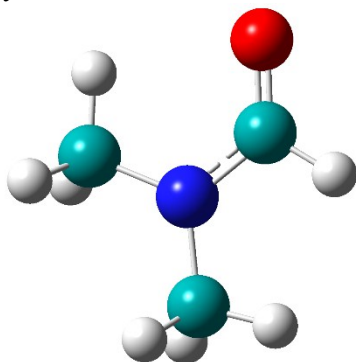

Figure S5: Optimized structures for the transition states and free radicals involved in reaction mechanism D, formation of dimethyl formamide out of dimethyl urea, obtained at B3LYP/6-31+G(d,p) level of theory. C atom, grey; N atom, blue; O atom, red.
